# Supplementary material for: A Comprehensive Evaluation of AI-Assisted Diagnostic Tools in ENT Medicine: Insights and Perspectives from Healthcare Professionals
Source: MDPI journal article supplement (doi:10.3390/jpm14040354), 2024-03-28
Supplement: s1 [file s1]

## **SURVEY QUESTIONNAIRE**

### Demographic Information

1. Age Group:

- ☐ Under 30
- ☐ 31-40
- ☐ 41-50
- ☐ 51-60
- ☐ Over 60

2. Years of Experience in ENT:

- ☐ Less than 5 years
- ☐ 5-10 years
- ☐ 11-20 years
- ☐ More than 20 years

3. Primary Practice Setting:

- ☐ Hospital
- ☐ Private Practice
- ☐ Academic/Research Institution
- ☐ Other: [Please Specify]

4. Have you previously used any AI-assisted diagnostic tools in your practice?

- ☐ Yes
- ☐ No

### Section 1: Familiarity and Perception

5. How familiar are you with the application of AI in ENT diagnostics?

- ☐ Very unfamiliar
- ☐ Unfamiliar
- ☐ Neutral
- ☐ Familiar
- ☐ Very familiar

6. What is your perception of the potential impact of AI in ENT diagnostics?

- ☐ Very negative
- ☐ Negative
- ☐ Neutral
- ☐ Positive
- ☐ Very positive

### Section 2: Usability and Functionality

7. If you have used AI tools, how easy was it to integrate them into your routine practice?

- ☐ Very difficult
- ☐ Difficult

- ☐ Neutral
- ☐ Easy
- ☐ Very easy

8. How do you rate the user-friendliness of the AI tools you have used?

- ☐ Very poor
- ☐ Poor
- ☐ Neutral
- ☐ Good
- ☐ Excellent

### Section 3: Clinical Impact

9. In your opinion, how accurately do AI tools assist in diagnosing ENT conditions?

- ☐ Very inaccurately
- ☐ Inaccurately
- ☐ Neutral
- ☐ Accurately
- ☐ Very accurately

10. Have AI-assisted tools impacted the efficiency of your diagnostic process?

- ☐ Significantly decreased efficiency
- ☐ Somewhat decreased efficiency
- ☐ No impact
- ☐ Somewhat increased efficiency
- ☐ Significantly increased efficiency

11. To what extent do you believe AI tools help in managing complex ENT cases?

- ☐ Not at all helpful
- ☐ Slightly helpful
- ☐ Moderately helpful
- ☐ Very helpful
- ☐ Extremely helpful

### Section 4: Trust and Dependability

12. How much do you trust the results provided by AI diagnostic tools?

- ☐ Do not trust at all
- ☐ Trust a little
- ☐ Neutral
- ☐ Trust
- ☐ Fully trust

13. Do you feel confident explaining AI tool's diagnostic findings to your patients?

- ☐ Not confident at all
- ☐ Slightly confident
- ☐ Neutral
- ☐ Confident
- ☐ Very confident

#### Section 5: Overall Experience and Future Prospects

14. Overall, how satisfied are you with the current AI-assisted diagnostic tools for ENT?

- ☐ Very dissatisfied
- ☐ Dissatisfied
- ☐ Neutral
- ☐ Satisfied
- ☐ Very satisfied

15. Do you see a role for AI in the future of ENT diagnostics?

- ☐ Definitely not
- ☐ Probably not
- ☐ Not sure
- ☐ Probably yes
- ☐ Definitely yes

#### Section 6: Feedback and Suggestions

16. What are the primary challenges or limitations you have faced while using AI in ENT diagnostics?

Answer:

17. In your view, what improvements or enhancements are needed in AI tools to make them more effective for ENT diagnostics?

Answer:

18. Are there specific ENT conditions or areas where you believe AI tools could be particularly beneficial?

Answer:

19. Please share any additional comments or insights you have regarding the use of AI in ENT practice.

Answer:

**Instructions for Participants:**

- Please answer each question based on your personal experience and opinions.
- Your responses are confidential and will be used to improve AI-assisted diagnostic tools in the field of ENT.
- Thank you for your valuable contribution to advancing ENT care.

**Conclusion**

We appreciate your time and effort in completing this questionnaire. Your insights are vital for understanding the current status and future potential of AI in ENT diagnostics.
